# Supplementary material for: Interfacial engineering of gallium indium phosphide photoelectrodes for hydrogen evolution with precious metal and non-precious metal based catalysts
Source: Royal Society of Chemistry journal article supplement (doi:10.1039/c9ta05247j), 2019-01-01
Supplement: c9ta05247j1.pdf [file c9ta05247j1.pdf]

## Supplementary Information

Interfacial Engineering of Gallium Indium Phosphide Photoelectrodes for Hydrogen Evolution with Precious Metal and Non-Precious Metal Based Catalysts

*Reuben J. Britto*<sup>†1</sup>, *James L. Young*<sup>†2</sup>, *Ye Yang*<sup>2</sup>, *Myles A. Steiner*<sup>3</sup>, *David T. LaFehr*<sup>2</sup>, *Daniel J. Friedman*<sup>3</sup>, *Mathew Beard*<sup>2</sup>, *Todd G. Deutsch*<sup>2</sup>, *Thomas F. Jaramillo*<sup>1\*</sup>

<sup>1</sup>Department of Chemical Engineering, Shriram Center, Stanford University, 443 Via Ortega, Stanford, California 94305, United States

<sup>2</sup>Chemistry and Nanoscience Center, and Materials Science Center, National Renewable Energy Laboratory, Golden, Colorado 80401, United States

<sup>3</sup>National Center for Photovoltaics, National Renewable Energy Laboratory, Golden, Colorado 80401, United States

<sup>†</sup>These authors contributed equally to this work

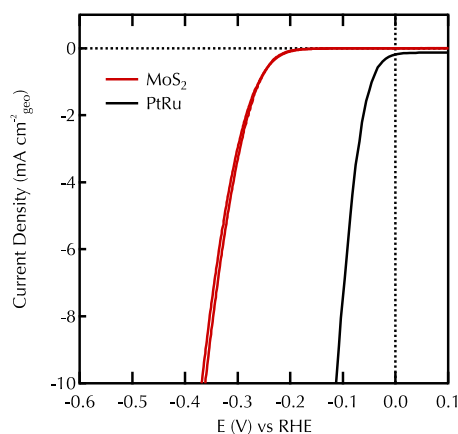

**Figure S1.** Electrochemical characterization of an MoS<sub>2</sub> film deposited on a degenerately doped n<sup>+</sup>-Si wafer in an identical manner to the pn<sup>+</sup>-GaInP<sub>2</sub>/MoS<sub>2</sub> photocathode presented in this work

and a PtRu catalyst deposited on fluorine doped tin oxide (FTO) in an identical manner to the  $\text{pn}^+\text{-GaInP}_2/\text{PtRu}$  photocathode presented in this work. LSVs were taken in 3M sulfuric acid.

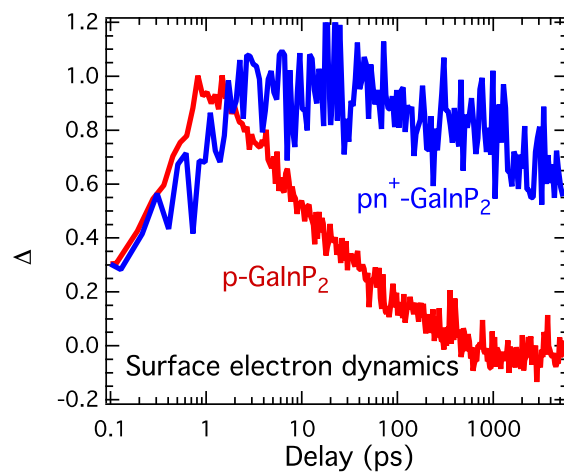

**Figure S2.** The surface electron dynamics of  $\text{pn}^+\text{-GaInP}_2$  and  $\text{p-GaInP}_2$ . These kinetic traces are obtained by monitoring the broad non-oscillatory features above band gap (discussed in the main text) from transient photoreflectance (TPR) spectra, attributed to the band filling effect and band gap renormalization primarily due to the surface electrons.<sup>1</sup>

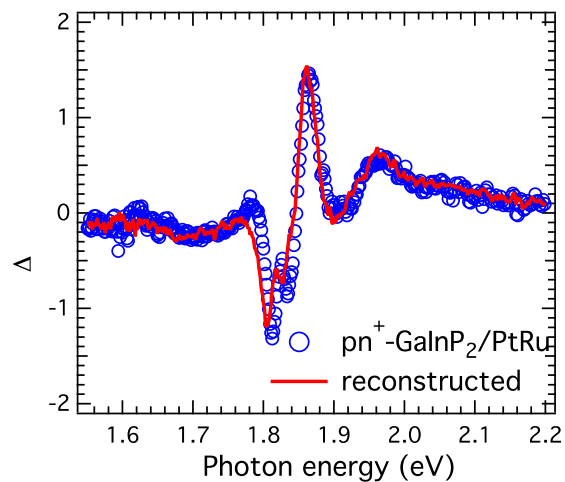

**Figure S3.** Comparison of the original TPR spectra of  $\text{pn}^+\text{-GaInP}_2/\text{PtRu}$  and that reconstructed from TPR spectra of  $\text{pn}^+\text{-GaInP}_2$  and  $\text{pn}^+\text{-GaInP}_2/\text{MoS}_2$ . The TPR spectrum of  $\text{pn}^+\text{-GaInP}_2/\text{PtRu}$  can be reconstructed by adding linearly scaled spectra of  $\text{pn}^+\text{-GaInP}_2$  and  $\text{pn}^+\text{-GaInP}_2/\text{MoS}_2$  with scaling factors of 0.65 and 0.35, respectively. This spectral analysis indicates 35% of electrons transferred to the PtRu and the rest are localized near the surface, which coincides with the surface coverage fraction ( $\sim 30\%$ ) by PtRu.<sup>2</sup>

**Table S1.** Photocathodes for hydrogen evolution

| Photocathode                                               | $E$ (onset at 1 mA cm <sup>-2</sup> ) vs RHE (V) | Average $J$ (mA cm <sup>-2</sup> ) | Reported Stability (h) | Charge Passed (Coulombs) | Year | Ref # |
|------------------------------------------------------------|--------------------------------------------------|------------------------------------|------------------------|--------------------------|------|-------|
| pn <sup>+</sup> -GaInP <sub>2</sub> /MoS <sub>2</sub>      | 0.91                                             | 13                                 | 100                    | 4320                     | 2018 | N/A   |
| pn <sup>+</sup> -GaInP <sub>2</sub> /PtRu                  | 0.83                                             | 15                                 | 6                      | 540                      | 2018 | N/A   |
| n <sup>+</sup> p-Si/MoS <sub>2</sub>                       | 0.33                                             | 10                                 | 120                    | 4320                     | 2013 | 15    |
| n <sup>+</sup> p-Si/MoS <sub>2</sub>                       | 0.35                                             | 17                                 | 100                    | 6120                     | 2014 | 16    |
| p-GaInP <sub>2</sub> /MoS <sub>2</sub>                     | 0.271                                            | 6.3                                | 70                     | 1587                     | 2016 | 17    |
| p-Si/Pt                                                    | 0.29                                             | 4                                  | 1440                   | 20736                    | 1996 | 43    |
| n <sup>+</sup> p-Si/TiO <sub>2</sub>                       | 0.47                                             | 20                                 | 720                    | 51840                    | 2013 | 44    |
| p-Si/nc-Si/TiO <sub>2</sub> /Pt                            | 0.58                                             | 18                                 | 984                    | 63763                    | 2017 | 45    |
| p-Si/SrTiO <sub>3</sub>                                    | 0.45                                             | 30                                 | 35                     | 3780                     | 2015 | 46    |
| n <sup>+</sup> p-Si/TiO <sub>2</sub> /Pt                   | 0.51                                             | 20                                 | 72                     | 5184                     | 2013 | 47    |
| nip a-Si/TiO <sub>2</sub> /Pt                              | 0.93                                             | 11                                 | 12                     | 475                      | 2013 | 48    |
| p-Si/Ti/Ni                                                 | 0.3                                              | 10                                 | 12                     | 432                      | 2015 | 49    |
| p-InP/TiO <sub>2</sub> /Pt                                 | 0.8                                              | 24                                 | 2                      | 172                      | 2015 | 50    |
| p-InP/TiO <sub>2</sub> /Ru                                 | 0.73                                             | 35                                 | 4                      | 504                      | 2012 | 51    |
| p-InP/RuRhPt                                               | 0.8                                              | 60                                 | 24                     | 3600                     | 1982 | 52    |
| p-CuGaSe <sub>2</sub>                                      | 0.1                                              | 10                                 | 4                      | 144                      | 2008 | 53    |
| p-Cu(In,Ga)Se <sub>2</sub> /n-CdS/Pt                       | 0.5                                              | 9                                  | 16                     | 518                      | 2010 | 54    |
| p-CuGaSe <sub>2</sub> /CdS/Pt                              | 0.6                                              | 4                                  | 288                    | 4147                     | 2013 | 55    |
| p-CuO/AZO/TiO <sub>2</sub> /Pt/MoS <sub>x</sub>            | 0.45                                             | 4.5                                | 10                     | 162                      | 2014 | 56    |
| p-Cu <sub>2</sub> O/AZO/TiO <sub>2</sub> /RuO <sub>2</sub> | 0.55                                             | 5                                  | 8                      | 144                      | 2014 | 57    |

|                                                                          |      |      |      |       |      |    |
|--------------------------------------------------------------------------|------|------|------|-------|------|----|
| $n^+p$ -Si/MoS <sub>2</sub>                                              | 0.28 | 11.5 | 1538 | 63673 | 2017 | 58 |
| p-CuGaSe <sub>2</sub> /CuGa                                              | 0.3  | 11.7 | 408  | 17000 | 2018 | 59 |
| p-(Ag,Cu)GaSe <sub>2</sub> /<br>CuGa <sub>3</sub> Se <sub>5</sub> CdS/Pt | 0.62 | 7.5  | 480  | 12960 | 2015 | 60 |
| p-CIGS/CdS/Ti/Mo/Pt                                                      | 0.6  | 19.5 | 240  | 16848 | 2015 | 61 |
| $n^+p$ -Si/MoSe <sub>2</sub>                                             | 0.4  | 27   | 120  | 11664 | 2018 | 62 |
| p-Si-NWs/MoS <sub>2</sub>                                                | 0.26 | 16.5 | 48   | 2851  | 2018 | 63 |
| $n^+p$ -Si-MWs/MoS <sub>2</sub>                                          | 0.54 | 9.3  | 288  | 9590  | 2018 | 64 |
| p-GaInP <sub>2</sub> /TiO <sub>2</sub> /MoS <sub>2x</sub>                | 0.4  | 11   | 20   | 792   | 2017 | 65 |

## REFERENCES

1. Yang Y, Gu J, Young JL, Miller EM, Turner JA, Neale NR, *et al.* Semiconductor interfacial carrier dynamics via photoinduced electric fields. *Science* 2015, **350**(6264): 1061.
2. Young JL, Steiner MA, Döscher H, France RM, Turner JA, Deutsch Todd G. Direct solar-to-hydrogen conversion via inverted metamorphic multi-junction semiconductor architectures. *Nature Energy* 2017, **2**: 17028.
